# Supplementary material for: Towards a More Efficient Breast Cancer Therapy Using Active Human Cell Membrane-Coated Metal–Organic Frameworks
Source: MDPI journal article supplement (doi:10.3390/nano14090784), 2024-04-30
Supplement: s1 [file s1]

# Towards a More Efficient Breast Cancer Therapy Using Active Human Cell Membrane-Coated Metal–Organic Frameworks

**Pablo Graván** <sup>1,2,3,4,5,6</sup>, **Sara Rojas** <sup>7</sup>, **Darina Francesca Picchi** <sup>8,9</sup>, **Francisco Galisteo-González** <sup>1</sup>,  
**Patricia Horcajada** <sup>8,\*</sup> and **Juan Antonio Marchal** <sup>2,3,4,5,6,\*</sup>

<sup>1</sup> Department of Applied Physics, Faculty of Science, University of Granada, 18071 Granada, Spain; [gravan@ugr.es](mailto:gravan@ugr.es) (P.G.); [galisteo@ugr.es](mailto:galisteo@ugr.es) (F.G.-G.)

<sup>2</sup> Department of Human Anatomy and Embryology, Faculty of Medicine, University of Granada, 18016 Granada, Spain

<sup>3</sup> Instituto de Investigación Biosanitaria de Granada (ibs. GRANADA), 18012 Granada, Spain

<sup>4</sup> Biopathology and Regenerative Medicine Institute (IBIMER), Centre for Biomedical Research (CIBM), University of Granada, 18016 Granada, Spain

<sup>5</sup> Excellence Research Unit Modelling Nature (MNat), University of Granada, 18016 Granada, Spain

<sup>6</sup> BioFab i3D—Biofabrication and 3D (Bio)Printing Laboratory, University of Granada, 18100 Granada, Spain

<sup>7</sup> Department of Inorganic Chemistry, Faculty of Science, University of Granada, Av. Fuentenueva s/n, 18071 Granada, Spain; [srojas@ugr.es](mailto:srojas@ugr.es)

<sup>8</sup> Advanced Porous Materials Unit, IMDEA Energy Institute, Av. Ramón de la Sagra 3, 28935 Móstoles, Spain; [darina.picchi@imdea.org](mailto:darina.picchi@imdea.org)

<sup>9</sup> Escuela Internacional de Doctorado, Universidad Rey Juan Carlos, c/Tulipan, s/n, Móstoles, 28933 Madrid, Spain

\* Correspondence: [patricia.horcajada@imdea.org](mailto:patricia.horcajada@imdea.org) (P.H.); [jmarchal@ugr.es](mailto:jmarchal@ugr.es) (J.A.M.)

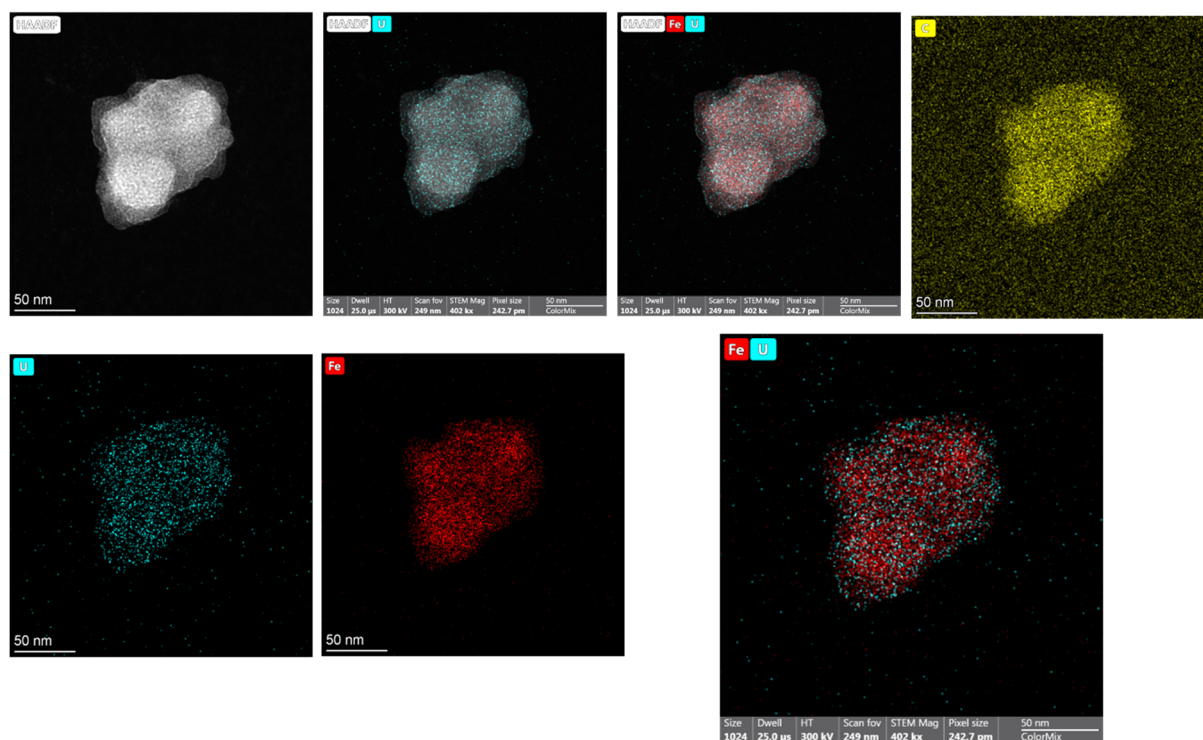

**Figure S1.** HR-TEM images and EDX-elemental mapping confirming the successful cell membrane coating of MIL-100(Fe) NPs (Fe: red, U: blue, C: yellow).

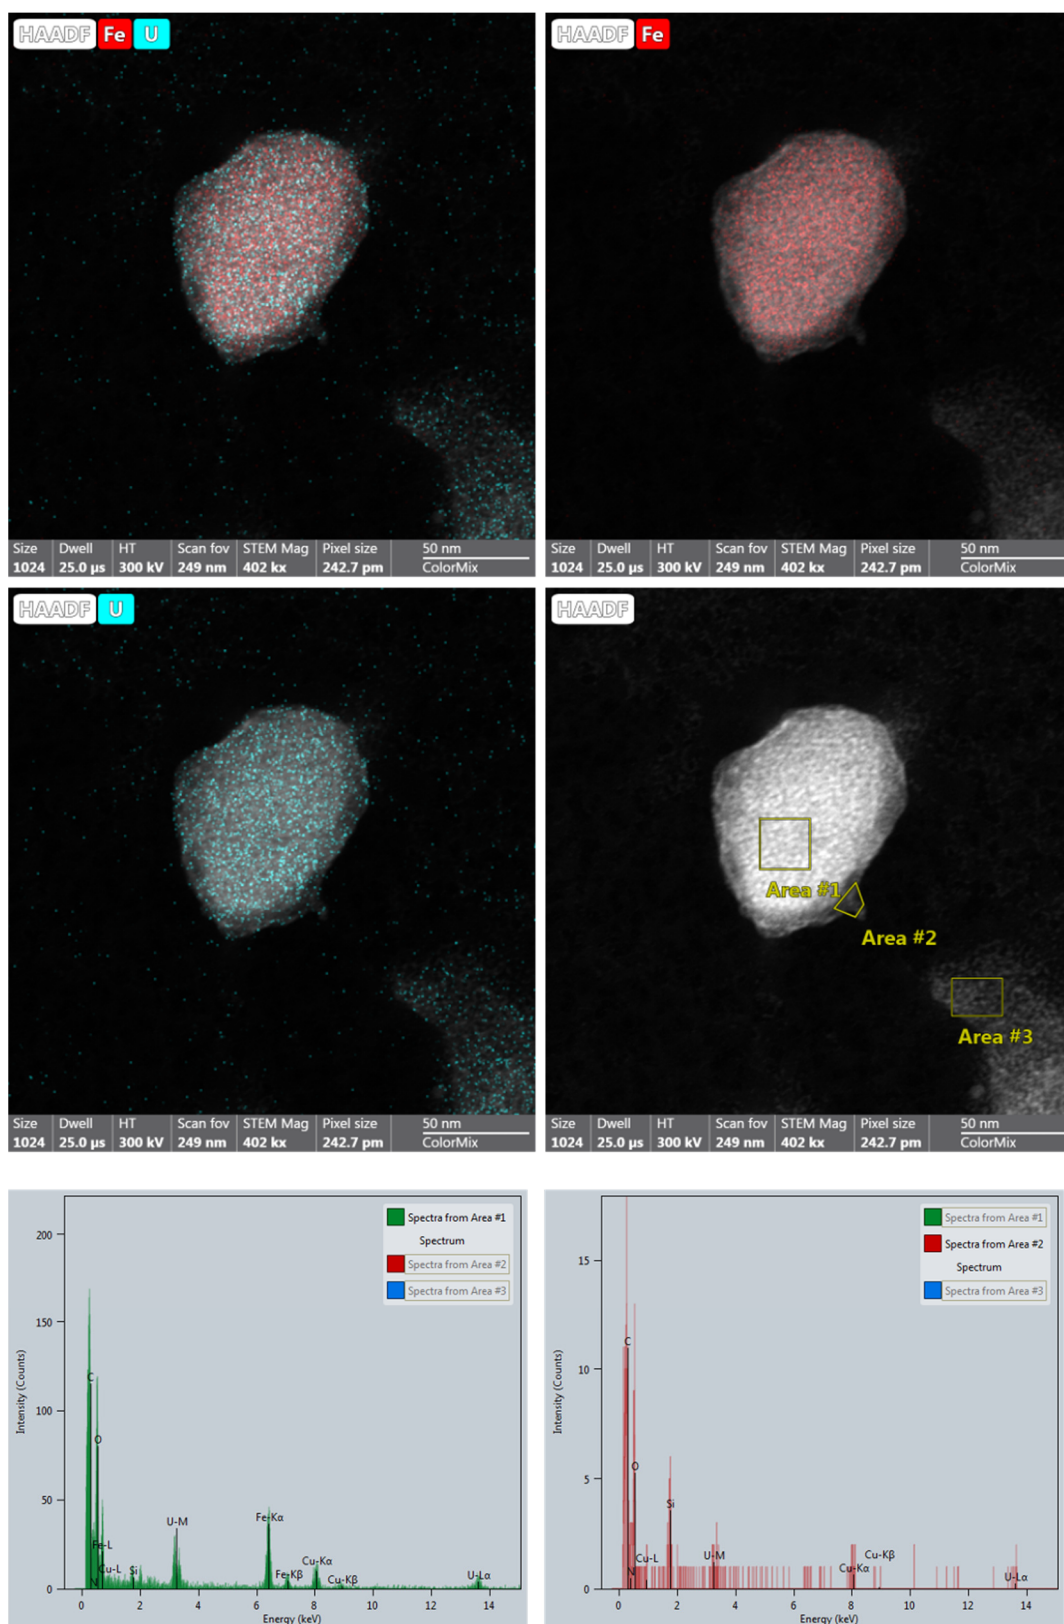

**Figure S2.** HR-TEM images and EDX-elemental mapping/counts of internal and external area of CS\_MIL-100(Fe) NPs confirming differences in the Fe:U ratio (Fe: red, U: blue, C: yellow).

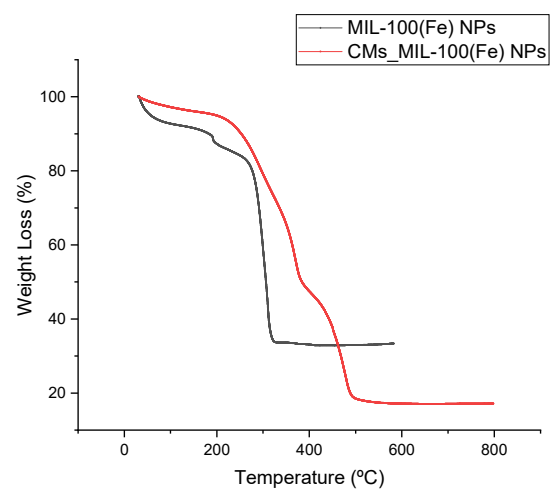

**Figure S3.** TGA trace for MIL-100(Fe) (black) and CMs\_MIL-100(Fe) NPs (red).
